# Supplementary material
Source: ML conference proceedings conference paper supplement (https://openreview.net/forum?id=fNBbEgcfwO)
Supplement: supplementary_material [file attachment]

The supplementary videos can be found on this website:

<https://surgical-rt.github.io/>
